# Supplementary material for: Atropisomeric benzamides and naphthamides as chiral auxiliaries †
Source: Royal Society of Chemistry journal article supplement (doi:10.1039/b004682p), 2000-01-01
Supplement: b004682p.doc [file b004682p.doc]

## Supplementary data

## Atropisomeric benzamides and naphthamides as chiral auxiliaries

**Jonathan Clayden,*[[1]](#footnote-2)† Madeleine Helliwell,[[2]](#footnote-3)‡ Catherine McCarthy and Neil Westlund**

Department of Chemistry, University of Manchester, Oxford Road, Manchester M13 9PL, UK

*4-(Dimethylamino)phenyl N,N-diisopropyl carbamate* **12c**. —A solution of 4-aminophenol **11b** (5g, 0.048 mol), methyl iodide (8.85 ml, 0.142 mol), sodium carbonate (5 g, 0.046 mol) and methanol was heated to reflux overnight. The solvent was removed under reduced pressure and the dark brown residue was distilled (kugelrohr). The distillate was taken up in diethylether (50 ml), filtered, concentrated under reduced pressure to afford **11c** as a pale yellow oil and dried under high vacuum overnight.

By the method used for **12a**, a solution of crude **11c** (1.345 g, 9.82 mmol), *N,N*-diisopropylcarbamyl chloride (2.410 g, 14.73 mmol) and anhydrous pyridine (10 ml) gave, after purification by flash chromatography on silica gel [6:1 petrol-EtOAc + 1% Et3N], *carbamate* **12c** (1.771 g, 68%) as a white solid, mp 95-96 ˚C (EtOAc); Rf 0.40 [4:1 petrol-EtOAc + 1% Et3N]; max, nm (max) (CH2Cl2) 256 (14140) 310 (2197); max (film)/cm-1 3044, 2974, 2932, 2893, 2804, 1707; H(300 MHz, CDCl3) 7.04 (2H, d, J 9.1, ArH), 6.77 (2H, d, J 9.1, ArH), 4.07 (2H, bm, 2 x NCH), 2.96 (6H, s, N(CH3)2), 2.95 (12H, bm, J 4.9, 4 x NCHC*H*3); C(75 MHz, CDCl3) 154.6, 148.3, 142.4, 122.1, 113.4, 46.3, 21.4 and 20.6; *m/z* (CI) 265 (100%, M+H+); *m/z* (EI) 264 (13%, M+), 137 (100%) and 136 (87%, M–CON*i*-Pr2) (Found: C, 67.63; H, 8.82; N, 10.52%; M+, 264.1833. C15H24N2O2 requires C, 68.2; H, 9.1; N, 10.6%; *M*, 264.1838).

*1,3-Benzodioxol-5-yl N,N-diisopropylcarbamate* **12d**. —In the same way, a solution of 1,3-benzodioxol-5-ol **11d** (557 mg, 4.03 mmol), *N,N*-diisopropylcarbamyl chloride (660 mg, 4.03 mmol) and anhydrous pyridine (5 ml) afforded *carbamate* **12d** (984 mg, 92%) as a pale brown solid which required no further purification, mp 48-50 ˚C (EtOAc); max, nm (max) (CH2Cl2) 236 (34100) 288 (30280);max (film)/cm-1 2973, 2935, 2880, 2776, 1722, 1712; H(300 MHz, CDCl3) 6.77 (1H, d, J 8.4, ArH), 6.68 (1H, d, J 2.3, ArH), 6.58 (1H, dd, J 8.4 and 2.3, ArH), 5.96 (2H, s, CH2), 4.08 (1H, bm, NCH), 3.98 (1H, bm, NCH), 1.33 (12H, bm, 4 x CH3); C(75 MHz, CDCl3) 154.0, 147.8, 145.7, 144.7, 114.1, 107.7, 106.5, 104.1, 46.8 (b), 46.0 (b), 21.4 (b) and 20.4 (b); *m/z* (CI) 266 (100%, M+H+); *m/z* (EI) 265 (4%, M+), 137 (3%, M–CON*i*-Pr2) and 86 (100%) (Found: M+, 265.1318. C14H19NO4 requires *M*, 265.1314).

*4-Methoxyphenyl N,N-diisopropyl carbamate* **12e**. —In the same way, a solution of 4-methoxyphenol **11e** (3.212 g, 25.9 mmol), *N,N*-diisopropylcarbamyl chloride (4.248 g, 26.0 mmol) and anhydrous pyridine (9.5 ml) gave, after kugelrohr distillation, *carbamate* **12d** as a colourless liquid (5.534 g, 85%), bp 213 ˚C (2.5 mmHg); max (film)/cm-1 3049, 2997, 2970, 2936, 2876, 1712; H(300 MHz, CDCl3) 7.07 (2H, dt, J 9.1 and 2.3, 2 x ArH), 6.91 (2H, dt, J 9.2 and 2.5, ArH), 4.11 (1H, bm, NCH), 3.99 (1H, bm, NCH), 3.81 (3H, s, OCH3), 1.34 (12H, bm, 4 x NCHC**H**3); C(75 MHz, CDCl3) 156.6, 154.2, 144.8, 122.6, 114.2, 55.5, 46.7, 45.9, 21.4 and 20.4; *m/z* (CI) 252 (100%, M+H+); *m/z* (EI) 251 (5%, M+), 128 (41%, M–CON*i*-Pr2) and 43 (100%) (Found: M+, 251.1524. C14H21NO3 requires *M*, 251.1521).

*4-Methoxyphenyl N,N-diethyl carbamate* **12f**.40. —In the same way, 4-methoxyphenol **11e** (2.844 g, 22.9 mmol), *N,N*-diethylcarbamyl chloride (2.90 ml, 22.9 ml) and anhydrous pyridine (9 ml) gave, after kugelrhor distillation, carbamate **12f**40(4.604 g, 90%) as a colourless oil, bp 175 ˚C, 1.5 mmHg; max (film)/cm-1 2975, 2936, 2876, 2836, 1719; H(300 MHz, CDCl3) 7.06 (2H, dd, J 9.1 and 2.3, ArH), 6.89 (2H, dd, J 9.1 and 2.3, ArH), 3.80 (3H, s, OCH3), 3.43 (4H, bm, 2 x CH2), 1.25 (6H, bm, 2 x CH2C*H*3); C(75 MHz, CDCl3) 156.7, 154.6, 145.0, 122.5, 114.2, 55.5, 42.1, 41.7, 14.1 and 13.3; *m/z* (CI) 224 (100%, M+H+); *m/z* (EI) 223 (15%, M+) and 100 (100%) (Found: M+, 223.1206. C12H17NO3 requires *M*, 223.1208).

*N,N-Diisopropyl-5-(dimethylamino)-2-hydroxybenzamide* **13c**. —In the same way as for compound **13a**, a solution of carbamate **12c** (557 mg, 2.11 mmol) in THF (35 ml) was treated with *sec*-butyllithium (1.95 ml, 2.53 mmol; 1.3 M solution in hexanes) and stirred for 16 hours at ambient temperature. Trituration of the crude product in cold ethyl acetate affordedthe *benzamide* **13c** (453 mg, 81%) as a white solid, mp 174-176 ˚C (EtOAc); Rf 0.18 [1:1 petrol-EtOAc + 1% Et3N]; max, nm (max) (CH2Cl2) 232 (16750) 344 (2993); max (film)/cm-1 3110, 3003, 2963, 2934, 2895, 2880, 2790, 1584; H(300 MHz, CDCl3) 8.22 (1H, bs, OH), 6.92 (1H, d, J 8.8, ArH), 6.82 (1H, d, J 8.5, ArH), 6.61 (1H, bm, ArH), 3.98 (2H, bm, 2 x NCH), 2.88 (6H, s, NMe2), 1.42 (12H, d, J 6.6, 4 x NCHC**H**3); C(75 MHz, CDCl3) 171.1, 149.1, 143.8, 121.2, 118.2, 117.6, 111.6, 48.8, 41.8 and 20.9; *m/z* (CI) 265 (100%, M+H+); *m/z* (EI) 264 (8%, M+) and 49 (100%) (Found: M+, 264.1841. C15H24N2O2 requires *M*, 264.1838).

*N,N-Diisopropyl-5-hydroxy-1,3-benzodioxole-4-carboxamide* **13d**. —In the same way, a solution of carbamate **12d** (858 mg, 3.24 mmol) in THF (10 ml) was added to a solution of *sec*-butyllithium (2.49 ml, 3.24 mmol; 1.3 M solution in hexanes) and TMEDA (0.49 ml, 3.24 mmol) in THF (20 ml) and allowed to warm to ambient temperature for 15 hours. Work-up in the usual manner afforded *the benzamide* **13d** (611 mg, 71%) as a pale brown solid which required no further purification, mp 179-182 ˚C (EtOAc);max (film)/cm-1 3214, 2973, 2935, 2882, 1604; H(300 MHz, CDCl3) 6.65 (1H, d, J 8.4, ArH), 6.37 (1H, d, J 8.4, ArH), 5.92 (2H, s, CH2), 3.80 (2H, bm, 2 x NCH), 1.38 (12H, bm, 4 x CH3); C(75 MHz, CDCl3) 165.8, 150.2, 143.5, 140.1, 109.1, 108.4, 108.2, 101.1, 49 (b) and 20.7; *m/z* (CI) 266 (100%, M+H+); *m/z* (EI) 265 (18%, M+) and 49 (100%) (Found: M+, 265.1315. C14H19NO4 requires *M*, 265.1314).

*N,N-Diisopropyl-2-hydroxy-5-methoxybenzamide* **13e**. —In the same way, a solution of carbamate **12e** (871 mg, 3.47 mmol) in THF (10 ml) was added to a solution of *sec*-butyllithium (3.20 ml, 4.16 mmol; 1.3 M solution in hexanes) and TMEDA (0.63 ml, 4.16 mmol) in THF (20 ml) and allowed to warm to ambient temperature for 15 hours. Work-up in the usual manner afforded the *benzamide* **13e** (793 mg, 91%) as a white solid which required no further purification, mp 111-112 ˚C (EtOAc); max (film)/cm-1 3150, 2994, 2968, 2934, 2853, 2837, 1593; H(300 MHz, CDCl3) 8.55 (1H, bs, OH), 6.77 (1H, d, J 2.9, ArH), 6.56 (2H, m, ArH), 3.95 (2H, bm, 2 x NCH), 3.76 (3H, s, OCH3), 1.41 (12H, d, J 6.6, 4 x NCHC*H*3); C(75 MHz, CDCl3) 171.0, 151.3, 149.3, 128.0, 120.6, 118.6, 108.7, 55.7, 48.8, 29.6 and 20.9; *m/z* (CI) 269 (100%, M+NH4+) (Found: M+NH4+, 269.1869. C14H21NO3 requires *M*+NH4+, 269.1865).

*N,N-Diisopropyl-2,5-dihydroxybenzamide* **13g**. —Boron tribromide dimethylsulfide complex (3.76 ml, 3.76 mmol; 1.0 M solution in dichloromethane) was added dropwise to a solution of benzamide **13e** (236 mg, 0.94 mmol) in dichloromethane (20 ml) at ambient temperature under an atmosphere of nitrogen. The resulting purple solution was heated to reflux for 6 hours, allowed to cool, treated with water (10 ml) and stirred for a further 20 minutes. The mixture was extracted with dichloromethane (3 x 20 ml). The combined organic extracts were dried (MgSO4), filtered and concentrated under reduced pressure. The resulting solid was flushed through a pad of silica with methanol to afford *N,N-diisopropyl-2,5-dihydroxybenzamide* **13g** (134 mg, 60 %) as a white solid, max (film)/cm-1 3206, 2990, 2925, 2873, 2849; H(300 MHz, DMSO-*d*6) 8.83 (2H, s, 2 x OH), 6.66 (1H, d, J 8.7, ArH), 6.57 (1H, dd, J 8.7 and 2.9, ArH), 6.39 (1H, d, J 2.9, ArH), 1.26 (12H, bm, 4 x CH3); C(75 MHz, CDCl3) 168.1, 150.1, 145.6, 127.4, 116.7, 116.0, 113.2, 45 (b) and 20.8; *m/z* (CI) 238 (100%, M+H+) (Found: M+, 237.1361. C13H19NO3 requires *M*, 237.1365).

*2-[(Diisopropylamino)carbonyl]-4-(dimethylamino)phenyl propionate* **14c**. —In the same way as for compound **14a**, a solution of benzamide **13c** (365 mg, 1.38 mmol) and *n*-butyllithium (0.86 ml, 1.38 mmol; 1.6 M solution in hexanes) in THF (15 ml) was treated with propionyl chloride (0.18 ml, 2.07 mmol). Work-up in the usual manner followed by flash chromatography on silica gel [2:1 petrol-EtOAc] afforded *the ester* **14c** (363 mg, 89%) as a colourless oil; Rf 0.39 [1:1 petrol-EtOAc]; max, nm (max) (CH2Cl2) 234 (9298) 262 (16900) 316 (3233); max (film)/cm-1 2968, 2937, 2880, 2805, 1757, 1721, 1641, 1632, 1607, 1583; H(300 MHz, CDCl3) 7.02 (1H, d, J 8.9, ArH), 6.70 (1H, dd, J 9.1 and 3.0, ArH), 6.51 (1H, d, J 3.0, ArH), 3.85 (1H, septet, J 6.6, NCH), 3.50 (1H, septet, J 6.9, NCH), 2.96 (6H, s, NMe2), 2.54 (2H, q, J 7.6, C*H*2CH3), 1.57 (3H, d, J 6.7, NCHC*H*3), 1.53 (3H, d, J 6.7, NCHC*H*3), 1.24 (3H, t, J 7.6, CH2C*H*3), 1.13 (6H, d, J 6.6, 2 x NCHC*H*3); C(75 MHz, CDCl3) 173.0, 167.5, 148.3, 137.0, 131.7, 123.2, 112.9, 109.3, 50.7, 45.6, 40.7, 27.4, 20.9, 20.5, 20.4 and 9.0; *m/z* (CI) 321 (100%, M+H+); *m/z* (EI) 320 (1%, M+) and 49 (100%) (Found: M+, 320.2099. C18H28N2O3 requires *M*, 320.2100).

*4-[(Diisopropylamino)carbonyl]-1,3-benzodioxol-5-yl propionate* **14d**. —In the same way, a solution of benzamide **13d** (162 mg, 0.61 mmol) and *n*-butyllithium (0.38 ml, 0.61 mmol; 1.6 M solution in hexanes) in THF (5 ml) was treated with propionyl chloride (0.08 ml, 0.92 mmol). After work-up in the usual manner, flash chromatography on silica gel [2:1 petrol-EtOAc] afforded *the ester* **14d** (183 mg, 93%) as a pale brown solid, mp 95-97 ˚C (EtOAc); Rf 0.39 [2:1 petrol-EtOAc]; max (film)/cm-1 2976, 2938, 1761, 1637; H(300 MHz, CDCl3) 6.78 (1H, d, J 8.5, ArH), 6.61 (1H, d, J 8.4, ArH), 6.03 (1H, d, J 9.9, OC*HA*HBO), 6.00 (1H ,d, J 9.9, OCHA*HB*O)3.88 (1H, septet, J 6.6, NCH), 3.52 (1H ,septet, J 6.9, NCH), 2.55 (2H, q, J 7.6, C*H*2CH3), 1.56 (3H, d, J 6.7, NCHC*H*3), 1.53 (3H, d, J 6.9, NCHC*H*3), 1.24 (3H, t, J 7.6, CH2C*H*3), 1.22 (3H, d, J 6.7, NCHC*H*3), 1.13 (3H, d, J 6.6, NCHC*H*3); C(75 MHz, CDCl3) 172.8, 162.0, 145.0, 143.8, 141.4, 115.4, 114.9, 107.6, 101.9, 51.2, 46.0, 27.3, 20.9, 20.7, 20.3, 20.2 and 8.9; *m/z* (CI) 322 (100%, M+H+) (Found: M+H+, 322.1655. C17H23NO5 requires *M*+H, 322.1654).

*Esterification of* ***13g****.* —*n*-Butyllithium (0.37 ml, 0.60 mmol; 1.6 M solution in hexanes) was added to a solution of benzamide **13g** (142 mg, 0.60 mmol) in THF (7 ml) at 0 ˚C under an atmosphere of nitrogen to give a cloudy brown mixture. Propionyl chloride (0.08 ml, 0.83 mmol) was added and the mixture was allowed to warm to ambient temperature and stirred overnight. The reaction mixture was treated with saturated aqueous ammonium chloride (5 ml) and extracted with dichloromethane (3 x 15 ml). The combined organic extracts were dried (MgSO4), filtered and concentrated under reduced pressure. Purification by flash chromatography [3:2 petrol-EtOAc] afforded *2-[(Diisopropylamino)carbonyl]-4-(propionyloxy)phenyl propionate* **14h** (111 mg, 53%) as a pale brown oil, Rf 0.54 [1:1 petrol-EtOAc]; max (film)/cm-1 2979, 2940, 2883, 1767, 1642, 1633; H(300 MHz, CDCl3) 7.18 (1H, d, J 8.8, ArH), 7.10 (1H, dd, J 8.8 and 2.6, ArH), 7.01 (1H, d, J 2.6, ArH), 3.82 (1H, J 6.6 septet, NCH), 3.50 (1H, septet, J 6.9, NCH), 2.57 (4H, m, 2 x CH2), 1.53 (6H, d, J 6.5, 2 x NCHCH3), 1.26 (3H, t, J 7.4, CH3CH2), 1.24 (3H, t, J 7.4, CH3CH2), 1.13 (6H, d, J 6.6, 2 x NCHCH3); C(75 MHz, CDCl3) 172.4, 172.2, 165.7, 147.8, 143.8, 132.2, 123.8, 122.0, 119.4, 50.9, 45.8, 27.6, 27.3, 20.6, 20.5, 20.3, 8.9 and 8.8; *m/z* (CI) 294 (100%, M+H+); *m/z* (EI) 293 (4%, M+).

Also obtained was *2-[(diisopropylamino)carbonyl]-4-hydroxyphenyl propionate* **14g** (56 mg, 32%) as a pale brown sticky solid.

*8-[(Diisopropylamino)carbonyl]-1-naphthyl propionate* **17**. —By the method used for **14a**, a solution of naphthamide **16**42(441 mg, 1.63 mmol) and *n*-butyllithium (1.02 ml, 1.63 mmol; 1.6 M solution in hexanes) in THF (5 ml) was treated with propionyl chloride (0.21 ml, 2.44 mmol) . After work-up in the usual manner, flash column chromatography on silica gel [3:1 petrol-EtOAc] afforded *the ester* **17** (437 mg, 82%) as a pale yellow oil, Rf 0.26 [petrol-EtOAc (2:1)]; max (film)/cm-1 3054, 2975, 2938, 2880, 1769, 1634; H(300 MHz, CDCl3) 7.89 (1H, d, J 8.2, ArH), 7.79 (1H, d, J 8.2, ArH), 7.51 (2H, m, ArH), 7.29 (1H, d, J 7.1, ArH), 7.24 (1H, d, J 7.6, ArH), 3.63 (1H, septet, J 6.7, NCH), 3.42 (1H, septet, J 6.7, NCH), 2.80 (1H, m, C*HA*HBCH3), 2.66 (1H, m, CHA*HB*CH3), 1.72 (3H, d, J 6.9, NCHC*H*3), 1.62 (3H, d, J 6.7, NCHC*H*3), 1.30 (3H, t, J 7.4, CH2C*H*3), 1.14 (3H, d, J 6.7, NCHC*H*3), 1.00 (3H, d, J 6.7, NCHC*H*3); C(75 MHz, CDCl3) 173.3, 171.2, 146.3, 135.3, 133.4, 128.6, 126.3, 125.8, 125.6, 124.9, 123.3, 120.3, 50.7, 45.6, 27.6, 22.1, 20.6, 20.0, 19.6 and 8.9; *m/z* (CI) 328 (100%, M+H+); *m/z* (EI) 327 (1%, M+) and 86 (100%) (Found: M+, 327.1832. C20H25NO3 requires *M*, 327.1834).

*4-Methoxy-2-methylphenyl N,N-diethylcarbamate* **21b**. In the same way as for compound **21a**, TMEDA (0.63 ml, 4.23 mmol), *sec*-butyllithium (3.25 ml, 4.23 mmol; 1.3 M solution in hexanes) and carbamate **12e** (857 mg, 3.84 mmol), with methyl iodide (0.48 ml, 7.71 mmol), gave *carbamate* **21b** (865 mg, 95%) which required no further purification. Rf 0.50 [2:1 petrol-EtOAc]; max (film)/cm-1 2975, 2935, 2877, 2836, 1720, 1712; H(300 MHz, CDCl3) 7.00 (1H, d, J 8.5, ArH), 6.74 (2H, m, ArH), 3.80 (3H, s, OCH3), 3.45 (4H, m, 2 x CH2), 2.22 (3H, s, ArCH3), 1.26 (6H, m, 2 x CH2C*H*3); C(75 MHz, CDCl3) 156.7, 154.3, 143.6, 131.4, 122.7, 116.0, 111.6, 55.4, 42.1, 41.7, 16.5, 14.2 and 13.4; *m/z* (CI) 238 (100%, M+H+); *m/z* (EI) 237 (21%, M+) and 100 (100%) (Found: M+, 237.1361. C13H19NO3 requires *M*, 237.1365).

*4-(Methoxymethoxy)-2-(trimethylsilyl)phenyl N,N-diisopropyl carbamate* **21e**. —In the same way as for compound **21c**, TMEDA (0.86 ml, 5.73 mmol) in THF (60 ml), *sec*-butyllithium (3.58 ml, 5.73 mmol; 1.3 M solution in hexanes) and carbamate **12i** (1.463 g, 5.21 mmol) in THF (30 ml), with chlorotrimethylsilane (0.86 ml, 6.768 mmol) gave, after purification by flash chromatography on silica gel [15:1 petrol-EtOAc] *carbamate* **21e** (869 mg, 47%) as a white solid, mp 57-58 ˚C (EtOAc); Rf 0.53 [5:1 petrol-EtOAc]; max (film)/cm-1 2995, 2966, 2899, 2826, 1722, 1712; H(300 MHz, CDCl3) 7.09 (1H, d, J 2.9, ArH), 7.06 (1H, dd, J 8.7 and 3.0, ArH), 6.92 (1H, d, J 8.7, ArH), 5.15 (2H, s, CH2), 4.35 (1H, septet, J 6.6, NCH), 3.73 (1H, septet, J 6.7, NCH), 3.48 (3H, s, OCH3), 1.35 (6H, d, J 6.7, 2 x NCHC*H*3), 1.29 (6H, J 6.9, 2 x NCHC*H*3), 0.28 (9H, s, Si(CH3)3); C(75 MHz, CDCl3) 154.0, 153.0, 150.6, 133.1, 123.2, 122.4, 117.7, 94.8, 55.8, 47.0, 45.8, 21.2, 20.5 and 1.0; *m/z* (CI) 354 (100%, M+H+); *m/z* (EI) 353 (12%, M+), 86 (100%) and 128 (53%, CONiPr2) (Found: M+, 353.2020. C18H31NO4Si requires *M*, 353. 2022). Also obtained was recovered carbamate **12i** (234 mg, 16%).

*N,N-Diethyl-2-hydroxy-5-methoxy-3-methylbenzamide* **22b**. —By the method used for **22a**, TMEDA (0.51 ml, 3.41 mmol) in THF (20 ml), *sec*-butyllithium (2.62 ml, 3.41 mmol; 1.3 M solution in hexanes) and carbamate **21b** (808 mg, 3.41 mmol) in THF (10 ml) gave, after purification by flash chromatography on silica gel [5:1 petrol-EtOAc] afforded *benzamide* **22b** (161 mg, 20%) as a sticky yellow solid,Rf 0.38 [2:1 petrol-EtOAc]; max (film)/cm-1 3200, 2973, 2936, 2835, 1588; H(300 MHz, CDCl3) 9.10 (1H, bs, OH), 6.82 (1H, d, J 2.9, ArH), 6.65 (1H, d, J 3.0, ArH), 3.78 (3H, s, OCH3), 3.54 (4H, q, J 7.0, 2 x CH2), 2.28 (3H, s, ArCH3), 1.30 (6H, J 7.0, 2 x CH2C*H*3); C(75 MHz, CDCl3) 171.5, 151.0, 150.2, 128.0, 119.5, 118.0, 109.1, 55.7, 42.0, 16.2 and 13.3; *m/z* (CI) 238 (100%, M+H+); *m/z* (EI) 237 (6%, M+) and 49 (100%) (Found: M+, 237.1374. C13H19NO3 requires *M*, 237.1365).

Also obtained was *N,N-Diethyl-2-(2-hydroxy-5-methoxyphenyl)acetamide* **23b** (103 mg, 13%) as a pale yellow oil, Rf 0.17 [2:1 petrol-EtOAc]; max (film)/cm-1 3250, 2976, 2936, 2877, 2833, 1622, 1613, 1600; H(300 MHz, CDCl3) 9.90 (1H, bs, OH), 6.90 (1H, d, J 8.8, ArH), 6.73 (1H, dd, J 8.8 and 3.0, ArH), 6.63 (1H, d, J 2.9, ArH), 3.74 (3H, s, OCH3), 3.68 (2H, s, C*H*2CONEt2), 3.49 (2H, q, J 7.1, NCH2), 3.39 (2H, q, J 7.1, NCH2), 1.28 (3H, t, J 7.1, CH2C*H*3), 1.12 (3H, t, J 7.2, CH2C*H*3); C(75 MHz, CDCl3) 172.3, 152.9, 150.7, 122.2, 118.3, 116.3, 113.3, 55.7, 43.4, 41.2, 36.6, 14.7 and 12.8; *m/z* (CI) 238 (100%, M+H+) (Found: M+, 238.1440. C13C19NO3 requires *M*, 238.1443).

Also obtained was *N,N,N’,N’-Tetraethyl-2-(2-hydroxy-5-methoxyphenyl) malonamide* **24b** (90 mg, 8%), Rf 0.00 [2:1 petrol-EtOAc]; max (film)/cm-1 3250, 2976, 2936, 2877, 2832, 1643, 1633; H(300 MHz, CDCl3) 8.25 (1H, bs, OH), 6.72-6.60 (3H, m, ArH), 5.06 (1H, s, ArCH), 3.72 (3H, s, OCH3), 3.40 (4H, q, J 7.1, 2 x CH2), 3.25 (4H, q, J 7.1, 2 x CH2), 1.15 (6H, t, J 7.0, 2 x CH2C*H*3), 1.08 (6H, t, J 7.0, 2 x CH2C*H*3); C(75 MHz, CDCl3) 168.3, 152.9, 149.4, 122.3, 117.8, 115.6, 114.6, 55.8, 50.7, 42.3, 40.9, 13.7 and 12.6; *m/z* (CI) 337 (94%, M+H+) and 74 (100%); *m/z* (EI) 336 (2%, M+) and 86 (100%) (Found: M+, 336.2054. C18H28N2O4 requires *M*, 336.2049). Also obtained was recovered carbamate **22b** (46 mg, 43%).

*2-[(Diisopropylamino)carbonyl]-4-methoxy-6-(trideuteriomethyl)phenyl propionate* **25c**. —By the method used for **14a**, a solution of amide **22c** (498 mg, 1.86 mmol), *n*-butyllithium (1.16 ml, 1.86 mmol; 1.6 M solution in hexanes) in THF (5 ml) and propionyl chloride (0.24 ml, 2.78 mmol) gave, after flash chromatography on silica gel [4:1 petrol-EtOAc] *ester* **25c** (432 mg, 72%) as colourless blades, mp 62-64 ˚C (EtOAc); max (film)/cm-1 2973, 2939, 2881, 2840, 1758, 1642, 1633; H(300 MHz, CDCl3) 6.77 (1H, d, J 2.9, ArH), 6.58 (1H, d, J 3.0, ArH), 3.83 (1H, m, NCH), 3.79 (3H, s, OCH3), 3.49 (1H, septet, J 6.9, NCH), 2.57 (2H, q, J 7.6, C*H*2CH3), 1.56 (3H, d, J 7.0, NCHC*H*3), 1.52 (3H, d, NCHC*H*3), 1.27 (3H, t, J 7.6, CH2C*H*3), 1.13 (6H, m, 2 x NCHC*H*3); C(75 MHz, CDCl3) 172.3, 166.8, 156.8, 138.9, 132.7, 132.5, 116.2, 108.6, 55.5, 50.8, 45.7, 27.1, 20.8, 20.4 and 9.1; *m/z* (CI) 325 (100%, M+H+); *m/z* (EI) 324 (1%, M+) and 49 (100%) (Found: M+, 324.2125. C18H14NO4D3 requires *M*, 324.2128).

*2-[(Diisopropylamino)carbonyl]-4-methoxy-6-(trimethylsilyl)phenyl propionate* **25d**. —In the same way, a solution of benzamide **22d** (657 mg, 2.03 mmol), *n*-butyllithium (1.27 ml, 2.03 mmol; 1.6 M solution in hexanes) in THF (5.4 ml) and propionyl chloride (0.26 ml, 3.05 mmol) gave *ester* **25d** (766 mg, 99%) as a pale yellow solid which required no further purification, mp 82-84 ˚C (EtOAc), max, nm, (max) (CH2Cl2) 232 (30710) 288 (10850); max (film)/cm-1 2964, 2836, 1757; H(300 MHz, CDCl3) 7.02 (1H, d, J 3.0, ArH), 6.77 (1H, d, J 3.0, ArH), 3.94 (1H, septet, J 6.7, NCH), 3.81 (3H, s, OCH3) 3.50 (1H, septet, J 6.6, NCH), 2.59 (2H, m, CH2), 1.56 (3H, d, J 6.9, NCHC*H*3), 1.52 (3H, d, J 6.9, NCHC*H*3), 1.26 (3H, t, J 7.6, CH2C*H*3), 1.20 (6H, d, J 6.3, NCHC*H*3), 0.30 (9H, s, Si(CH3)3); C(75 MHz, CDCl3) 173.1, 167.0, 156.2, 145.2, 135.0, 132.1, 120.6, 55.5, 50.8, 45.7, 41.5, 27.5, 21.0, 20.3, 8.7 and 1.0; *m/z* (CI) 380 (100%); *m/z* (EI) 379 (2%m M+),86 (100%), 84 (100%), 48 (100%) and 35 (100%) (Found: M+, 379.2187. C20H33NO4Si requires *M*, 379.2179).

*N,N,N’N’-Tetraisopropyl benzene-1,4-diyl dicarbamate* **29b**. —By the method used for compound **12a**, carbamate **12g** (1.487 g, 6.27 mmol), *N,N*-diisopropylcarbamyl chloride (1.130 g, 6.90 mmol) and pyridine (10 ml) afforded *dicarbamate* **29b** (1.965 g, 86%) as white blades, mp 173-175 ˚C (EtOAc); max, nm (max) (CH2Cl2) 230 (15110) 266 (3270); max (film)/cm-1 2970, 2934, 2875, 1712, 1691; H(300 MHz, CDCl3) 7.13 (4H, s, ArH), 4.13 (2H, bm, 2 x NCH), 3.96 (2H, bm, 2 x NCH), 1.35 (24H, bm, 8 x CH3); C(75 MHz, CDCl3) 153.7, 148.1, 122.3, 46.8 (b), 21.4 (b) and 20.5 (b); *m/z* (CI) 382 (100%, M+NH4+), 365 (26%, M+H+) and 128 (CONiPr2); *m/z* (EI) 364 (26%, M+) and 128 (74%, CONiPr2) (Found: M+, 364.2367. C20H32N2O4 requires *M*, 364.2362).

*N,N,N’N’-Tetraisopropyl 3,6-bis(trimethylsilyl)benzene-1,4-diyl dicarbamate* **31**. —A solution of carbamate **29b** (1.784 g, 4.90 mmol) in THF (30 ml) was added to a stirred solution of *sec*-butyllithium (8.29 ml, 10.8 mmol; 1.3 M solution in hexanes), TMEDA (1.74 ml, 10.8 mmol) and THF (60 ml) at -78 ˚C under nitrogen. After 65 minutes, chlorotrimethylsilane (1.87 ml, 14.7 mmol) was added. The mixture was stirred for 5 minutes and allowed to warm to ambient temperature. Saturated aqueous ammonium chloride (10 ml) was added and the THF was removed under reduced pressure. The aqueous phase was diluted with water (20 ml) and extracted with dichloromethane (4 x 35 ml). The combined organic extracts were dried (MgSO4), filtered and concentrated under reduced pressure. The crude product was recrystallised from ethyl acetate to afford *dicarbamate* **31** (2.000 g, 80%) as white blades, mp 112-114 ˚C (EtOAc); max (film)/cm-1 2966, 2940, 2897, 2881, 1712; H(300 MHz, CDCl3) 6.72 (2H, s, ArH), 4.03 (2H, septet, J 6.7, 2 x NCH), 3.51 (2H, septet, J 6.9, 2 x NCH), 1.07 (12H, d, J 6.9, 4 x NCHC*H*3), 1.03 (12H, d, J 6.7, 4 x NCHC*H*3), 0.00 (18H, s, 2 x SiMe3); C(75 MHz, CDCl3) 153.3, 152.7, 134.3, 128.1, 46.8, 45.9, 21.3, 20.5 and -1.0; *m/z* (CI) 509 (29%, M+H+) and 128 (100%, CONiPr2); *m/z* (EI) 508 (3%, M+), 128 (67%, CONiPr2) and 86 (100%) (Found: M+, 508.3147. C26H48N2O4Si2 requires *M*, 508.3152).

*5-[(Diisopropylamino)carbonyl]-4-hydroxy-2-(trimethylsilyl)phenyl N,N-diisopropylcarbamate* **32**. —By the method used for **13a**, carbamate **31** (1.699 g, 3.34 mmol) in THF (20 ml), *sec*-butyllithium (5.66 ml, 7.36 mmol; 1.3 M solution in hexanes) and TMEDA (1.11 ml, 7.36 mmol) in THF (40 ml) gave, after flash chromatography on silica gel [5:1 petrol-EtOAc] *benzamide* **32** (636 mg, 44%) as a pale brown solid, max (film)/cm-1 3248, 2968, 2935, 2899, 1715; H(300 MHz, CDCl3) 9.11 (1H, s, OH), 7.02 (1H, s, ArH), 6.78 (1H, s, ArH), 4.35 (1H, septet, J 6.9, NCH), 3.96 (2H, bm, 2 x NCH(carbamate)), 3.69 (1H, septet, J 6.9, NCH), 1.4-1.1 (24H, m, 8 x NCHC*H*3), 0.26 (9H, s, Si(CH3)3); C(75 MHz, CDCl3) 170.3, 154.1, 153.3, 147.1, 136.2, 123.1, 120.6, 21.1, 20.9, 20.4 and 1.1; *m/z* (CI) 437 (100%, M+H+) and 128 (44%, CONiPr2); *m/z* (EI) 436 (6%, M+), 128 (50%, CONiPr2) and 86 (100%) (Found: M+, 436.2757. C23H40N2O4Si requires *M*, 436.2757).

*(R*a,1’R*)-N,N-Diisopropyl-8-(dimethylamino)-2-[1-hydroxy-2-propynyl]-1-naphthamide**anti*-**45c**. —The aldehyde**41** (150 mg, 0.46 mmol) in THF (10 mL) was added to a stirred solution of ethynylmagnesium bromide (1.1 mL, of a 0.5 M solution in hexane) in THF (10 mL) at 0 ˚C under nitrogen. The mixture was warmed to room temperature, stirred overnight, cautiously added to saturated NH4Cl (50 mL), and extracted with dichloromethane (260 mL). The extracts were washed with sodium bicarbonate solution and brine, dried (MgSO4) and evaporated under reduced pressure. Analytical HPLC of the crude mixture showed that the isomers were present in a ratio of 3 (*anti*):1 (*syn*). Purification by column chromatography SiO2, [EtOAc-petrol 1:4] gave the *alkyne anti*-**45c**(119 mg, 74%) as yellow oil; *Rf*[EtOAc-petrol,1:4] 0.16; max (film)/cm-1 2973 (CH), 1600 (C=O); H (300 MHz; CDCl3) 8.05 (1H, d, *J* 8, ArH), 7.85 (1H, d, *J* 8, ArH), 7.50 (1H, t, *J* 7, ArH), 7.40 (1H, d, *J* 7, ArH), 7.20 (1H, d, *J* 7 ArH), 5.80 (1H, s, HCOH), 3.50 [1H, septet, *J* 7, NCH(CH3)2], 2.80 (3H, s, NMe), 2.70 (1H, s, alkyne H), 2.50 (3H, s, NMe), 1.70 (3H, d, *J* 7, NCHCH3), 1.65 (3H, d, *J* 7, NCHC*H*3), 0.95 (3H, d, *J* 7, NCHC*H*3) and 0.90 (3H, d, *J* 7, NCHC*H*3); C (75 MHz; CDCl3) 171.0 (C=O), 135.8, 129.3, 126.6, 126.5, 125.3, 125.1, 124.3, 123.9, 116.9, 116.5 (ArC), 75.0 (COH), 62.0, 50.6 (alkyne C) 50.5, 50.2 (NMe2), 46.0, 43.5 (NCH2), 20.5, 20.4, 20.2, 19.5 (4x CH3); m/z (CI) 353 (90%, (M+H)+), 102 (100%), (EI) 86 (56%, 2iPr), 84 (83%) and 49 (100%); (Found: (M+H)+, 353.2229. C22H28N2O2 requires *M*+1, 353.2229).

*Attempted addition of BuTi(Oi-Pr)3 to* ***41****. —*Chlorotitanium triisopropoxide (0.31 mL, 0.9 mmol) was added to a stirred solution of the aldehyde **41** in THF (50 mL) under nitrogen at -78˚C. After 40 min at -78˚C, *n*-butyllithium (0.9 mL, 1.4 mmol) was added dropwise and the mixture was allowed to warm to 0˚C and stirred at 0˚C for 6 hrs, poured into aqueous 1M HCl and extracted with dichloromethane (260 mL). The extracts were washed with sodium bicarbonate solution and with brine, dried (MgSO4) and evaporated under reduced pressure. Purification by column chromatography [EtOAc-petrol, 1:10] gave *N,N-Diisopropyl-8-(dimethylamino)-2-pentyl-1-naphthamide* **50**mgas a yellow oil*Rf*[EtOAc-petrol,1:10] 0.51; max (film)/cm-1 2955 (C-N), 1609 (C=O); H (300 MHz; CDCl3) 7.64 (1H, d, *J* 8, ArH), 7.45 (1H, d, *J* 8, ArH), 7.3 (1H, d, 8.5, ArH), 7.28 (1H, t, *J* 8, ArH), 7.14 (1H, d, *J* 7.5, ArH), 3.40 [1H, septet, *J* 7, NCH(CH3)2], 2.94 [1H, septet, *J* 7, NCH(CH3)2], 2.72 (3H, s, NMe), 2.46 (3H, s, NMe), 1.58 (3H, d, *J* 7, NCHCH3), 1.55 (3H, *J* 7, NCHCH3), 1.3 [8H, m, (CH2)4], 0.86 (3H, t, *J* 7, CH3), 0.80 (3H, d, *J* 7, NCHCH3) and 0.75 (3H, *J* 7, NCHCH3); C (75 MHz; CDCl3) 169.7 (C=O), 151.7, 137.8, 133.5, 131.8, 128.0, 128.0, 126.9, 125.1, 124.2, 116.7 (ArC), 50.6, 49.6 (NMe2), 45.5, 43.9 (NCH2), 33.6, 32.3, 31.5, 22.5 (CH2)4), 20.6, 20.5, 20.4, 19.8 (4CH3) and 14.0 (CH3). m/z (CI) 369 (100%, (M+H)+), 268 (30%), (EI) 268 (100%), 197 (60%) and 86 (35%, 2iPr); (Found (EI): M+, 368.2832. C24H36N2O requires *M*, 368.2828).

Also obtained was *3-Butyl-9-(dimethylamino)-1,3-dihydrobenzo[e]isobenzofuran-1-one* **48** as a yellow oil, (20 mg, 15%), *Rf*[EtOAc-petrol,1:1] 0.2; max (film)/cm-1 2954 (C-N), 1719 (C=O); H (300 MHz; CDCl3) 7.98 (1H, d, *J* 8, ArH), 7.40 (2H, m, ArH), 7.30 (1H, d, *J* 8 ArH), 7.10 (1H, t *J* 5 ArH), 5.38 (1H, q, *J* 4, OCOCH), 2.80 (6H, s, NMe2), 2.10 [1H, m, C*HA*CHB(CH2)2CH3], 1.70 [1H, m, CHAC*HB*(CH2)2CH3], 1.30 [4H, m, CH2(CH)2CH3] and 0.80 (3H, t, *J* 7, CH3); m/z (CI) 284 (100%, (M+H)+), (EI) 168 (100%) and 86 (50%, 2iPr); (Found (EI): M+, 283.1574. C18H21N1O2 requires *M*, 283.1572).

*Attempted addition of MeTi(Oi-Pr)3 to* ***41****.* —Chlorotitanium triisopropoxide (0.2 mL of a 1.6 M solution in hexane) was added to a solution of methyllithium (17 L, 0.55 mmol) in THF (20 mL) at -78˚C under argon and stirred for 30 mins. The mixture was allowed to warm to 0˚C and the *aldehyde* **41** (150 mg, 0.46 mmol) was added dropwise over 5 mins. The mixture was stirred at 0˚C for 6 hrs, poured into aqueous HCl (1M) and extracted with dichloromethane (260 mL). The extracts were washed with sodium bicarbonate solution and brine, dried (MgSO4) and evaporated under reduced pressure. Purification by column chromatography [EtOAc-petrol,1:6] gave *9-(Dimethylamino)-3-methyl-1,3-dihydrobenzo[e]isobenzofuran-1-one* **49** as a pale yellow oil, (70 mg, 63%), *Rf*[EtOAc-petrol, 1:6] 0.34; H (300 MHz; CDCl3) 8.05 (1H, d, *J* 8, ArH), 7.80 (1H, d, *J* 8, ArH), 7.50 (1H, t, *J* 7, ArH), 7.40 (1H, d, *J* 7, ArH), 7.10 (1H, d, *J* 7, ArH), 4.60 (1H, q, *J* 7, OCOC*H*Me), 2.90 (6H, s, NMe2) and 2.50 (3H, d, J 7, CH3).

(R*a,1’S*)-N,N-Diisopropyl-2[-1-hydroxypentyl]-8-methoxy-1-naphthamide anti-46a. —Trimethylaluminium (16L of a 2 M solution in hexane) was added to a stirred solution of n-butyllithium (0.24 mL of a 1.6 M solution in hexane) in THF (50 mL) under nitrogen at -78˚C. Almost immediately the aldehyde 42 (110 mg, 0.32 mmol) was added and the mixture was stirred for 1 hr at -78˚C, 1 hr at 0˚C and 1 hr at room temperature, poured into aqueous HCl (1M) and extracted with dichloromethane (260 mL). The extracts were washed with sodium bicarbonate solution and with brine, dried (MgSO4) and evaporated under reduced pressure. Analytical HPLC of the crude mixture showed that the atropisomers were present in a ratio of 20 (anti): 1 (syn); Purification by column chromatography SiO2, [EtOAc: petrol,1:4] gave alcohol anti-46a (78 mg, 66%) as a yellow solid, m.p. 186-189 ˚C; max (film)/cm-1 3387 (OH), 1628 (C=O); H (300 MHz; CDCl3) 7.72 (1H, d, J 8.5, ArH), 7.60 (1H, d, J 8.5, ArH), 7.40-7.32 (2H, m, ArH), 6.80 (1H, d, *J* 7, ArH), 4.95 [1H, q, *J* 4.5, RC*H*(OH)R], 3.86 (3H, s, OMe), 3.6-3.3 [2H, septet2, *J* 7, NC*H*(CH3)2], 1.80 [2H, m, C*H*2(CH2)CH3], 1.60 (3H, d, *J* 7, NCHC*H*3), 1.55 (3H, d, *J* 7, NCHC*H*3), 1.30 [4H, m, (C*H*2)2CH3], 0.90 (3H, d, *J* 7, NCHC*H*3), 0.85 (3H, d, *J* 7, NCHC*H*3) and 0.80 (3H, t, *J* 7, CH3); m/z (CI) 372 (100%, (M+H)+), (EI) 254 (100%), 213 (78%), 86 (44%, 2iPr) and 43 (12%, iPr); (Found (EI): M+, 371.2455. C23H23NO3 requires *M*, 371.2460).

*N,N-Diisopropyl-2-[(4R,5S)-3,4-dimethyl-5-phenyl-1,3-oxazolidin-2-yl]-8-methoxy-1-naphthamide* **56**. —(1*R*,2*S*)-Ephedrine **55** (80 mg, 0.48 mmol) was added to a solution of thealdehyde **42** (100 mg, 0.32 mmol) in toluene (20 mL). The solution was heated to reflux for 48 hrs, cooled, and the toluene removed under reduced pressure. Purification by column chromatography on alumina, (EtOAc: petroleum ether, 1:3) gave a single diastereoisomer of the *oxazolidine* **56** (120 mg, 43%) as a white solid,m.p. 204-207 ˚C; *Rf*(EtOAc: petrol,1:3) 0.27; max (film)/cm-1 2963 (CH), 1625 (C=O); H (300 MHz; CDCl3) 8.00 (1H, d, *J* 8.5, ArH), 7.80 (1H, d, *J* 8.5, ArH), 7.5-7.2 (7H, m, ArH), 6.80 (1H, d, *J* 7, ArH), 5.05 (1H, d, *J* 8.5, OC*H*Ph), 5.00 [1H, s, OCHN], 3.86 (3H, s, OMe), 3.50 [1H, septet, *J* 7, NC*H*(CH3)2], 3.45 [1H, septet, *J* 7, NC*H*(CH3)2], 2.90 (1H, m, NC*H*CHPh), 2.10 (3H, s, NMe), 1.64 [3H, d, *J* 7, NCH(C*H*3)2], 1.60 (3H, d, *J* 7, NCHC*H*3), 1.55 (3H, d, *J* 7, NCHC*H*3), 0.98 (3H, d, *J* 7, NCHC*H*3), 0.88 (3H, d, *J* 7, NCHC*H*3) and 0.74 (3H, d, *J* 6.5, CHC*H*3); C (75 MHz; CDCl3) 169.2 (C=O), 155.6, 139.5, 135.4, 134.3, 131.7, 128.2, 127.7, 127.4, 126.5, 125.9, 120.7, 105.8 (16 ArC), 93.5 (Ar-*C*(OR)(NR), 81.9 (RO*C*HPh), 63.9 (OMe), 54.9 (NMe), 50.7, 45.7 (NCH2), 35.7 (R(NMe)*C*HCH3), 20.1, 20.0, 19.9, 19.3 (4CH3) and 15.3 (CH3); m/z (CI) 461 (100%, (M+H)+), (EI) 100 (100%); (Found (EI): (M+H)+, 461.2804. C29H33N2O3 requires *M*+1, 461.2804).

1. † Email j.p.clayden@man.ac.uk [↑](#footnote-ref-2)
2. ‡ Author to whom enquiries regarding the crystal structure should be directed [↑](#footnote-ref-3)
